## Geriatric nutritional risk index (GNRI) predicts long-term survival and limb events in patients with peripheral artery disease

M. Horiguchi, H. Yamagishi, K. Unno, T. Takamura, K. Tone, S. Sakabe, K. Maeno, D. Izumi, T. Seko, A. Kasai

*Ise City Red Cross Hospital, Ise, Japan*

**Funding Acknowledgement:** Type of funding source: None

**Background:** Geriatric nutritional risk index (GNRI) was developed as a "nutrition-related" risk index and was reported in different populations as associated with the risk of all-cause and cardiovascular morbidity and mortality.

**Purpose:** The purpose of this study was to assess the associations of GNRI with mortality and amputation free survival in patients with peripheral artery disease (PAD).

**Methods:** From January 2011 to June 2016, 295 consecutive patients (73.3±9.2 years; 75.6% male) with PAD undergoing endovascular treatment (EVT) in our hospital were retrospectively examined. The GNRI on admission was calculated as follows:  $14.89 \times \text{serum albumin (g/dl)} + 41.7 \times \text{body mass index (BMI)}/22$ . Characteristics and mortality were compared between 2 groups: low GNRI (<92, n=110) with moderate or severe nutritional risk; and high GNRI (≥92, n=185) with no or low nutritional risk.

**Results:** The median follow up period was 39.4±26.4 months. There were 85 deaths (28.8%) and 13 major amputation (4.4%) during the follow-up. Patients in the low-GNRI group were more often higher age, non-ambulatory state, hemodialysis and critical limb ischemia. BMI, serum hemoglobin, albumin, low-density lipoprotein were significantly lower, whereas serum C-reactive protein was significantly higher in the low-GNRI group than the high-GNRI group ( $P<0.05$ , respectively). Kaplan–Meier analysis revealed that patients in the low-GNRI group had a significantly lower amputation free survival, compared to those in the high-GNRI group (log-rank test,  $P<0.001$ ).

**Conclusion:** The low GNRI is associated with an increased risk of mortality and limb events in patients with PAD.

Table 1. Clinical characteristics

|                           | Overall (n=295) | High GNRI (n=185) | Low GNRI (n=110) | P-value |
|---------------------------|-----------------|-------------------|------------------|---------|
| Age, years                | 73.2±9.2        | 71.7±8.8          | 76.1±9.2         | <0.001  |
| Male, %                   | 223 (75.6)      | 142 (76.8)        | 81 (73.6)        | 0.546   |
| Body mass index           | 22.6±3.4        | 24.1±3.0          | 20.1±2.7         | <0.001  |
| Diabetes, %               | 174 (59.0)      | 117 (63.2)        | 57 (51.8)        | 0.054   |
| Hemodialysis, %           | 77 (26.1)       | 41 (22.2)         | 36 (32.7)        | 0.046   |
| Non-ambulatory status, %  | 54 (18.3)       | 13 (7.0)          | 41 (37.3)        | <0.001  |
| Critical limb ischemia, % | 111 (37.6)      | 51 (27.6)         | 60 (54.6)        | <0.001  |
| Serum hemoglobin, g/dl    | 11.9±2.6        | 12.7±1.8          | 10.7±2.2         | <0.001  |
| Serum albumin, g/dl       | 3.5±0.6         | 3.8±0.4           | 3.0±0.5          | <0.001  |
| Major amputation, %       | 13 (4.4)        | 4 (2.2)           | 9 (8.2)          | 0.015   |
| All cause death, %        | 85 (28.8)       | 39 (21.1)         | 46 (41.8)        | <0.001  |

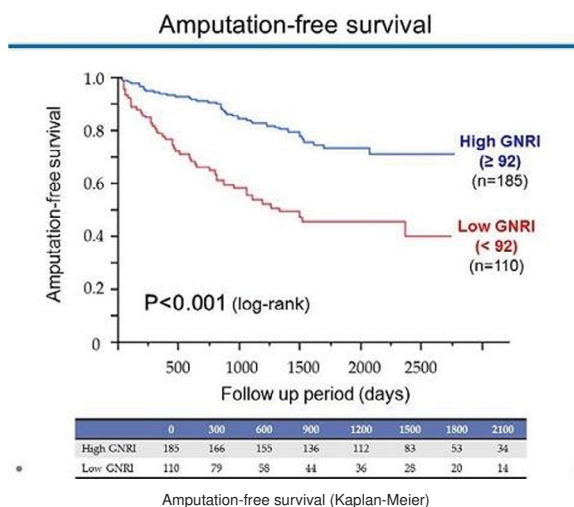

Source: http://academic.oup.com/eurheartj/article-pdf/41/Supplement_2/ehaa946.2356/34513902/ehaa946.2356.pdf
